# Supplementary material for: Rehmannia glutinosa Libosch Extracts Prevent Bone Loss and Architectural Deterioration and Enhance Osteoblastic Bone Formation by Regulating the IGF-1/PI3K/mTOR Pathway in Streptozotocin-Induced Diabetic Rats
Source: PubMed Central journal article supplement (PMC6720794; doi:10.3390/ijms20163964), 2019-08-15
Supplement: ijms-20-03964-s001.pdf [file ijms-20-03964-s001.pdf]

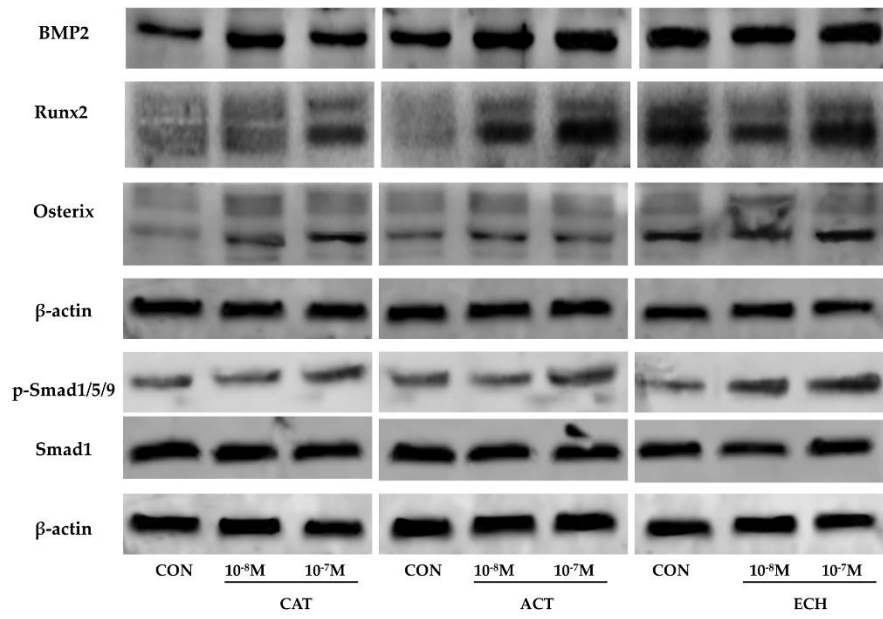

Figure S1

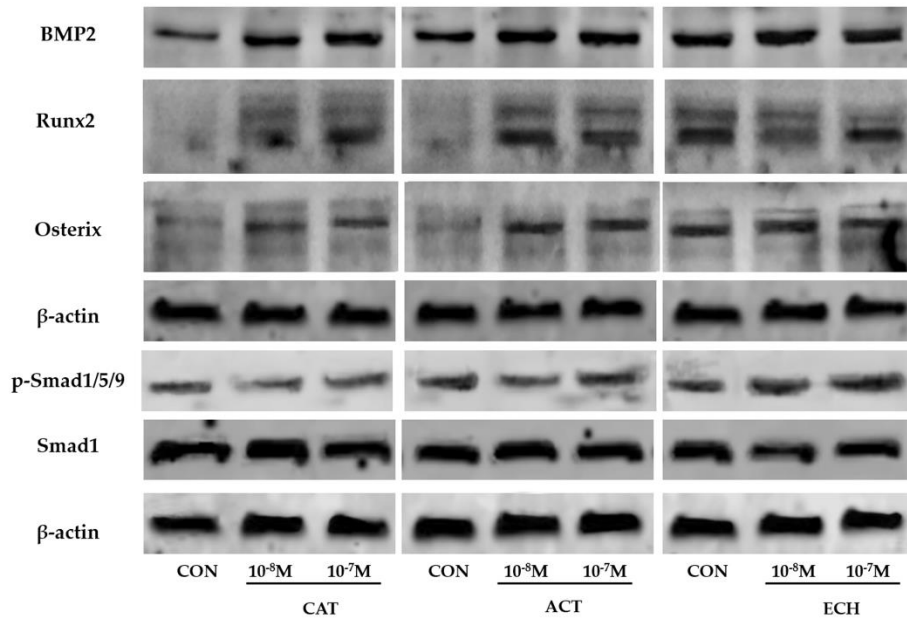

Figure S2

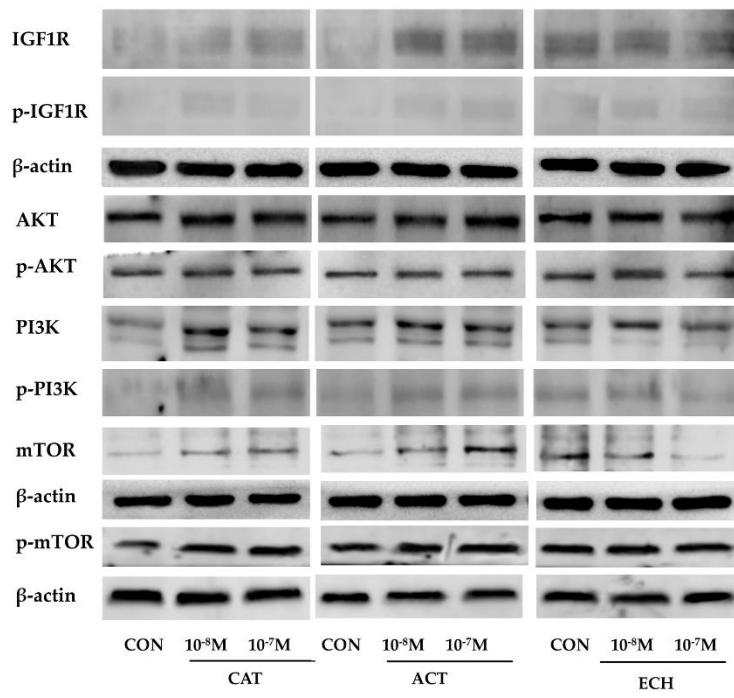

Figure S3

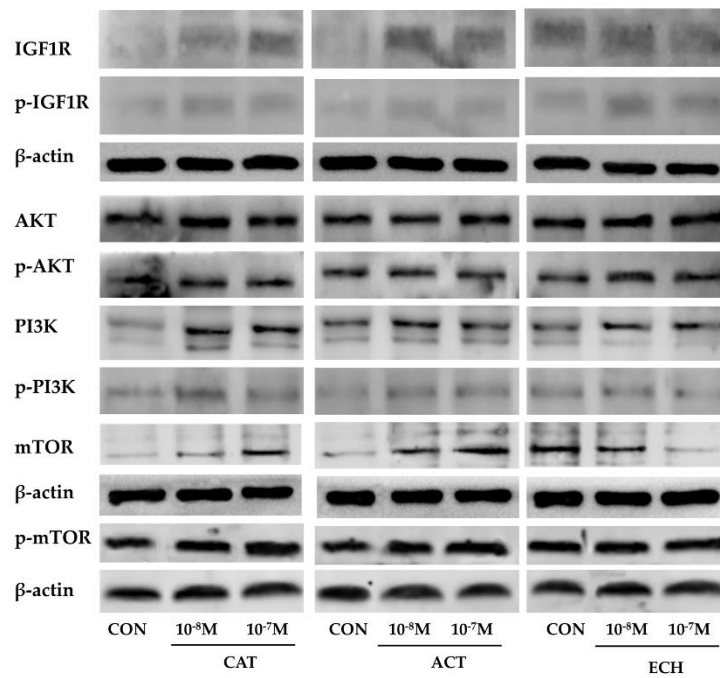

Figure S4
